# Supplementary material for: MiR-205 suppressed the malignant behaviors of breast cancer cells by targeting CLDN11 via modulation of the epithelial-to-mesenchymal transition
Source: publisher site journal article supplement (doi:10.18632/aging.202988), 2021-05-08
Supplement: Supplementary file [file aging-v13i9-202988-supplementary-material-SD1.pdf]

## SUPPLEMENTARY FIGURES

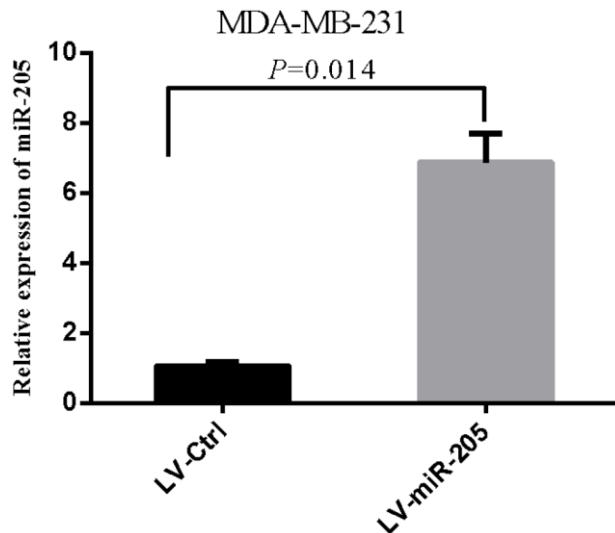

Supplementary Figure 1. miR-205 expression levels were significantly over-expressed in breast cancer cells MDA-MB-231 infected with lentivirus-miR-205.

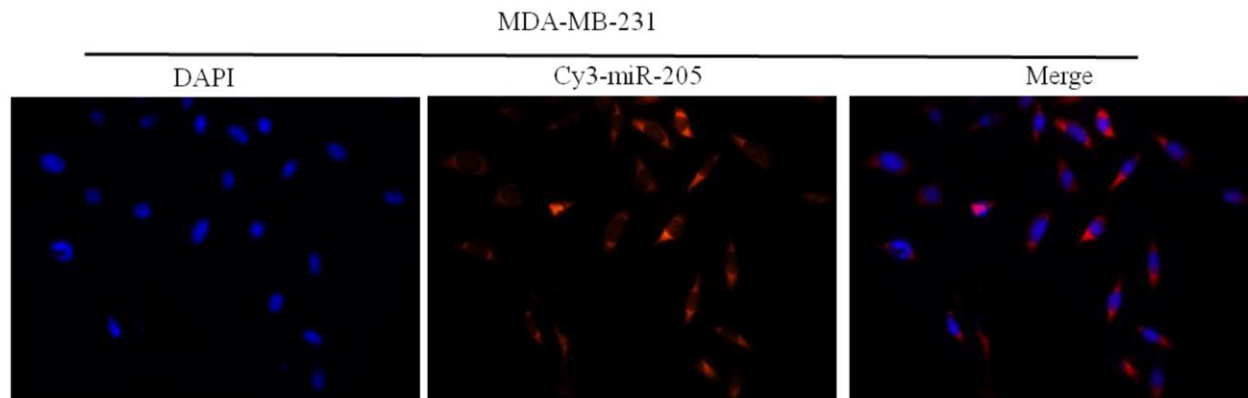

Supplementary Figure 2. FISH was used to detect miR-205 location in breast cancer cells MDA-MB-231. blue, DAPI; Red, miR-205.
